# Supplementary material
Source: PubMed Central journal article supplement (PMC5597853)
Supplement: gix056_Response-to-Reviewer-Comments_Revision-1.pdf [file gix056_Response-to-Reviewer-Comments_Revision-1.pdf]

## **Author's Response To Reviewer Comments**

We corrected the two typos noted by Reviewer 2. Also uploaded to GigaDB the landmark points that Reviewer 2 requested, and added this information to the manuscript.

Editor asked we add funding information - added. The RRIDs added by the editor are fine, thank you.
